# Supplementary material
Source: publisher figshare collection journal article supplement (https://acs.figshare.com/ndownloader/files/5707860)
Supplement: Supplementary file 1 [file 5707860]

# ic970577q.cif

#========================================================================
data_global
#========================================================================

# TITLE AND AUTHOR LIST

_publ_section_title
;Re(V) and Tc(V) Oxo Complexes of Cysteine
;
loop_
_publ_author_name
_publ_author_address
'Mita Chatterjee'
;         Department of Nuclear Medicine
          Indian Institute of Chemical Biology
          4 Raja S.C. Mullick Road, Calcutta-700 032
          India
;
'Basudeb Achari'
;         Department of Medicinal Chemistry
          Indian Institute of Chemical Biology
          4 Raja S.C. Mullick Road, Calcutta-700 032
          India
;
'Satyabrata Das'
;         Crystallography & Molecular Biology Division
          Saha Institute of Nuclear Physics
         1/AF Bidhannagar, Calcutta-700 064
         India
;
'Rahul Banerjee'
;         Crystallography & Molecular Biology Division
          Saha Institute of Nuclear Physics
          1/AF Bidhannagar, Calcutta-700 064
          India
;
'Chandana Chakrabarti'
;         Crystallography & Molecular Biology Division
          Saha Institute of Nuclear Physics
          1/AF Bidhannagar, Calcutta-700 064
          India
;
'Jiban K. Dattagupta'
;         Crystallography & Molecular Biology Division
          Saha Institute of Nuclear Physics
          1/AF Bidhannagar, Calcutta-700 064
          India
;
'Somenath Banerjee'
;         Department of Nuclear Medicine
          Indian Institute of Chemical Biology
          4 Raja S.C. Mullick Road, Calcutta-700 032
          India
;
#======================================================================= 

# Table IV. Crystal data

_chemical_name_common             ? 
_chemical_formula_moiety          
;
 Re O (C6 H11 N2 O4 S2),Re O (C6 H10 N2 O4 S2) 1-
,P(C6 H5)4 1+,4(H2 O)
;
_chemical_formula_structural      ? 
_chemical_formula_analytical      ? 
_chemical_formula_sum             'C36 H49 N4 O14 P Re2 S4' 
_chemical_formula_weight          1293.40 
_chemical_melting_point           ? 
_chemical_compound_source          
;
 Compound has been synthesised, purified and
 crystallized in the laboratory. 
;

loop_ 
 _atom_type_symbol 
 _atom_type_description 
 _atom_type_scat_dispersion_real 
 _atom_type_scat_dispersion_imag 
 _atom_type_scat_source 
 'C'  'C'   0.0181   0.0091 
 'International Tables Vol C Tables 4.2.6.8 and 6.1.1.4' 
 'H'  'H'   0.0000   0.0000 
 'International Tables Vol C Tables 4.2.6.8 and 6.1.1.4' 
 'N'  'N'   0.0311   0.0180 
 'International Tables Vol C Tables 4.2.6.8 and 6.1.1.4' 
 'O'  'O'   0.0492   0.0322 
 'International Tables Vol C Tables 4.2.6.8 and 6.1.1.4' 
 'S'  'S'   0.3331   0.5567 
 'International Tables Vol C Tables 4.2.6.8 and 6.1.1.4' 
 'P'  'P'   0.2955   0.4335 
 'International Tables Vol C Tables 4.2.6.8 and 6.1.1.4' 
 'Re'  'Re'  -5.7900   5.8910 
 'International Tables Vol C Tables 4.2.6.8 and 6.1.1.4' 
 
_symmetry_cell_setting            orthorhombic 
_symmetry_space_group_name_H-M    'P 212121' 
 
loop_ 
 _symmetry_equiv_pos_as_xyz 
 'x, y, z' 
 '-x+1/2, -y, z+1/2' 
 '-x, y+1/2, -z+1/2' 
 'x+1/2, -y+1/2, -z' 
 
_cell_length_a                    9.700(2) 
_cell_length_b                    12.836(3) 
_cell_length_c                    36.228(3) 
_cell_angle_alpha                 90.00 
_cell_angle_beta                  90.00 
_cell_angle_gamma                 90.00 
_cell_volume                      4510.7(15) 
_cell_formula_units_Z             4 
_cell_measurement_temperature     293(2) 
_cell_measurement_reflns_used     25 
_cell_measurement_theta_min       9 
_cell_measurement_theta_max       12
 
_exptl_crystal_description        'rectangular plate' 
_exptl_crystal_colour             'dark brown' 
_exptl_crystal_size_max           0.65 
_exptl_crystal_size_mid           0.50 
_exptl_crystal_size_min           0.30 
_exptl_crystal_density_meas       1.94(2)
_exptl_crystal_density_diffrn     1.905 
_exptl_crystal_density_method     'flotation in benzene-bromoform mixture' 
_exptl_crystal_F_000              2500 
_exptl_absorpt_coefficient_mu     12.980 
_exptl_absorpt_correction_type    ' empirical '
_exptl_absorpt_correction_T_min   0.6559 
_exptl_absorpt_correction_T_max   0.9994 
 
_exptl_special_details 
; 
 ? 
; 
 
_diffrn_ambient_temperature       293(2) 
_diffrn_radiation_wavelength      1.54180 
_diffrn_radiation_type            CuKa  
_diffrn_radiation_source          'fine-focus sealed tube' 
_diffrn_radiation_monochromator   graphite 
_diffrn_measurement_device        'CAD4 diffractometer ' 
_diffrn_measurement_method        \w/2\q 
_diffrn_standards_number          3 
_diffrn_standards_interval_count  200 
_diffrn_standards_interval_time   120 
_diffrn_standards_decay_%         'not significant' 

loop_
_diffrn_standard_refln_index_h
_diffrn_standard_refln_index_k
_diffrn_standard_refln_index_l
  0 -1  8
 -1  1  8
  0  1  8

_diffrn_reflns_number             5186 
_diffrn_reflns_av_R_equivalents   0.0310 
_diffrn_reflns_av_sigmaI/netI     0.0191 
_diffrn_reflns_limit_h_min        0 
_diffrn_reflns_limit_h_max        12 
_diffrn_reflns_limit_k_min        0 
_diffrn_reflns_limit_k_max        16 
_diffrn_reflns_limit_l_min        0 
_diffrn_reflns_limit_l_max        45 
_diffrn_reflns_theta_min          2.44 
_diffrn_reflns_theta_max          74.93 
_reflns_number_total              5184 
_reflns_number_observed           5016 
_reflns_observed_criterion        >2sigma(I) 
 
_computing_data_collection        ' CAD-4 software (Enraf Nonius,1989) ' 
_computing_cell_refinement        ' CAD-4 software (Enraf Nonius,1989) ' 
_computing_data_reduction         'SDP (Enraf Nonius,1985) ' 
_computing_structure_solution     'SHELXS-86 (Sheldrick, 1990)' 
_computing_structure_refinement   'SHELXL-93 (Sheldrick, 1993)' 
_computing_molecular_graphics     ' ORTEX 2.1a (McArdle, 1993)' 
_computing_publication_material   ' SHELXL-93 (Sheldrick, 1993) ' 
 
_refine_special_details 
; 
 Refinement on F^2^ for ALL reflections except for 0 with very negative F^2^ 
 or flagged by the user for potential systematic errors.  Weighted R-factors 
 wR and all goodnesses of fit S are based on F^2^, conventional R-factors R 
 are based on F, with F set to zero for negative F^2^. The observed criterion 
 of F^2^ > 2sigma(F^2^) is used only for calculating _R_factor_obs etc. and is 
 not relevant to the choice of reflections for refinement.  R-factors based 
 on F^2^ are statistically about twice as large as those based on F, and R- 
 factors based on ALL data will be even larger. 
 The unaccounted minimum difference fourier peak is of 0.65,1.01, 2.33 and
 2.37\%A from Re1,O1,N21 and S2 respectively and the maximum peak is 1.24,
 2.19,2.49, and 2.52\%A from O4W,O11,O32 and O2W respectively.
; 
 
_refine_ls_structure_factor_coef  Fsqd  
_refine_ls_matrix_type            full 
_refine_ls_weighting_scheme 
 'calc w=1/[s^2^(Fo^2^)+( 0.1410P)^2^+90.1287P] where P=(Fo^2^+2Fc^2^)/3' 
_atom_sites_solution_primary      direct 
_atom_sites_solution_secondary    difmap 
_atom_sites_solution_hydrogens    geom 
_refine_ls_hydrogen_treatment     noref 
_refine_ls_extinction_method      SHELXL 
_refine_ls_extinction_coef        0.00043(4) 
_refine_ls_extinction_expression 
 'Fc^*^=kFc[1+0.001xFc^2^l^3^/sin(2q)]^-1/4^' 
_refine_ls_abs_structure_details 
 'Flack H D (1983), Acta Cryst. A39, 876-881' 
_refine_ls_abs_structure_Flack    0.00(3) 
_refine_ls_number_reflns          5184 
_refine_ls_number_parameters      551 
_refine_ls_number_restraints      0 
_refine_ls_R_factor_all           0.0652 
_refine_ls_R_factor_obs           0.0638 
_refine_ls_wR_factor_all          0.1694 
_refine_ls_wR_factor_obs          0.1679 
_refine_ls_goodness_of_fit_all    0.775 
_refine_ls_goodness_of_fit_obs    0.782 
_refine_ls_restrained_S_all       0.775 
_refine_ls_restrained_S_obs       0.782 
_refine_ls_shift/esd_max          -8.354 
_refine_ls_shift/esd_mean         0.520 
 

#========================================================

# Table V. Atomic Positional Parameters


loop_ 
 _atom_site_label 
 _atom_site_type_symbol 
 _atom_site_fract_x 
 _atom_site_fract_y 
 _atom_site_fract_z 
 _atom_site_U_iso_or_equiv 
 _atom_site_thermal_displace_type 
 _atom_site_occupancy 
 _atom_site_calc_flag 
 _atom_site_refinement_flags 
 _atom_site_disorder_group 
Re1 Re 0.9207(1) 0.0623(1) 0.8387(1) 0.0364(2) Uani 1 d . . 
O1 O 0.8893(15) 0.1852(10) 0.8380(4) 0.054(3) Uani 1 d . . 
Re2 Re 0.3126(1) -0.5842(1) 0.8626(1) 0.0409(2) Uani 1 d . . 
O2 O 0.3511(14) -0.4669(10) 0.8787(3) 0.051(3) Uani 1 d . . 
S1 S 0.7407(5) -0.0130(4) 0.8689(1) 0.0474(9) Uani 1 d . . 
C11 C 0.6150(18) -0.0355(15) 0.8318(5) 0.049(4) Uani 1 d . . 
H111 H 0.5574(18) -0.0949(15) 0.8378(5) 0.050 Uiso 1 calc R . 
H112 H 0.5561(18) 0.0251(15) 0.8290(5) 0.050 Uiso 1 calc R . 
C12 C 0.6945(17) -0.0562(13) 0.7956(4) 0.039(3) Uani 1 d . . 
H121 H 0.7452(17) -0.1219(13) 0.7981(4) 0.050 Uiso 1 calc R . 
C13 C 0.5989(19) -0.0639(15) 0.7627(5) 0.048(4) Uani 1 d . . 
N11 N 0.7917(15) 0.0271(11) 0.7911(4) 0.041(3) Uani 1 d . . 
H1N1 H 0.7449(15) 0.0851(11) 0.7850(4) 0.050 Uiso 1 calc R . 
H1N2 H 0.8472(15) 0.0113(11) 0.7720(4) 0.050 Uiso 1 calc R . 
O11 O 0.6045(19) 0.0030(13) 0.7375(4) 0.075(4) Uani 1 d . . 
O12 O 0.5095(17) -0.1387(15) 0.7625(5) 0.082(5) Uani 1 d . . 
S2 S 1.0662(6) 0.0359(5) 0.8882(1) 0.0659(13) Uani 1 d . . 
C21 C 1.2296(22) 0.0273(24) 0.8630(7) 0.082(7) Uani 1 d . . 
H211 H 1.2759(22) 0.0943(24) 0.8637(7) 0.050 Uiso 1 calc R . 
H212 H 1.2889(22) -0.0236(24) 0.8747(7) 0.050 Uiso 1 calc R . 
C22 C 1.2057(27) -0.0027(25) 0.8249(8) 0.084(8) Uani 1 d . . 
H221 H 1.2923(27) -0.0092(25) 0.8111(8) 0.050 Uiso 1 calc R . 
C23 C 1.1243(29) -0.0991(27) 0.8232(8) 0.089(8) Uani 1 d . . 
N21 N 1.1148(16) 0.0783(14) 0.8087(4) 0.055(4) Uani 1 d . . 
H2N1 H 1.1023(16) 0.0672(14) 0.7844(4) 0.050 Uiso 1 calc R . 
H2N2 H 1.1509(16) 0.1422(14) 0.8119(4) 0.050 Uiso 1 calc R . 
O21 O 0.9903(16) -0.0935(12) 0.8209(4) 0.061(3) Uani 1 d . . 
O22 O 1.1803(27) -0.1923(20) 0.8238(7) 0.132(9) Uani 1 d . . 
S3 S 0.4386(5) -0.6992(4) 0.8980(1) 0.0505(10) Uani 1 d . . 
C31 C 0.5837(24) -0.7231(19) 0.8673(5) 0.064(5) Uani 1 d . . 
H311 H 0.6638(24) -0.6848(19) 0.8759(5) 0.050 Uiso 1 calc R . 
H312 H 0.6062(24) -0.7967(19) 0.8673(5) 0.050 Uiso 1 calc R . 
C32 C 0.5469(23) -0.6885(18) 0.8285(5) 0.061(5) Uani 1 d . . 
H321 H 0.6262(23) -0.6968(18) 0.8120(5) 0.050 Uiso 1 calc R . 
C33 C 0.4267(23) -0.7496(18) 0.8145(5) 0.058(5) Uani 1 d . . 
N31 N 0.4995(16) -0.5779(14) 0.8288(4) 0.052(3) Uani 1 d . . 
H3N1 H 0.4807(16) -0.5554(14) 0.8058(4) 0.050 Uiso 1 calc R . 
H3N2 H 0.5633(16) -0.5358(14) 0.8390(4) 0.050 Uiso 1 calc R . 
O31 O 0.3072(15) -0.7114(12) 0.8240(3) 0.057(3) Uani 1 d . . 
O32 O 0.4389(19) -0.8325(13) 0.7981(4) 0.073(4) Uani 1 d . . 
S4 S 0.1105(5) -0.6335(4) 0.8891(1) 0.0493(10) Uani 1 d . . 
C41 C -0.0142(19) -0.5802(15) 0.8576(5) 0.052(4) Uani 1 d . . 
H411 H -0.0998(19) -0.6189(15) 0.8595(5) 0.050 Uiso 1 calc R . 
H412 H -0.0329(19) -0.5082(15) 0.8640(5) 0.050 Uiso 1 calc R . 
C42 C 0.0371(20) -0.5854(19) 0.8190(5) 0.057(5) Uani 1 d . . 
H421 H 0.0509(20) -0.6586(19) 0.8122(5) 0.050 Uiso 1 calc R . 
C43 C -0.0563(32) -0.5344(28) 0.7907(7) 0.092(9) Uani 1 d . . 
N41 N 0.1760(16) -0.5301(14) 0.8190(4) 0.056(4) Uani 1 d . . 
H4N1 H 0.1622(16) -0.4612(14) 0.8217(4) 0.050 Uiso 1 calc R . 
H4N2 H 0.2172(16) -0.5404(14) 0.7970(4) 0.050 Uiso 1 calc R . 
O41 O -0.0077(19) -0.4661(18) 0.7675(5) 0.097(6) Uani 1 d . . 
O42 O -0.1797(25) -0.5606(24) 0.7928(9) 0.150(10) Uani 1 d . . 
P1 P 0.6954(4) -0.4794(3) 0.9821(1) 0.0334(7) Uani 1 d . . 
C51 C 0.7998(17) -0.4424(12) 1.0207(4) 0.036(3) Uani 1 d . . 
C52 C 0.8074(24) -0.3387(14) 1.0307(5) 0.054(5) Uani 1 d . . 
H52 H 0.7566(24) -0.2893(14) 1.0178(5) 0.050 Uiso 1 calc R . 
C53 C 0.8892(24) -0.3084(17) 1.0596(5) 0.062(5) Uani 1 d . . 
H53 H 0.8909(24) -0.2393(17) 1.0672(5) 0.050 Uiso 1 calc R . 
C54 C 0.9682(22) -0.3815(16) 1.0769(5) 0.053(4) Uani 1 d . . 
H54 H 1.0253(22) -0.3606(16) 1.0961(5) 0.050 Uiso 1 calc R . 
C55 C 0.9666(23) -0.4811(17) 1.0673(5) 0.056(5) Uani 1 d . . 
H55 H 1.0243(23) -0.5283(17) 1.0792(5) 0.050 Uiso 1 calc R . 
C56 C 0.8783(18) -0.5154(14) 1.0393(4) 0.043(4) Uani 1 d . . 
H56 H 0.8725(18) -0.5858(14) 1.0333(4) 0.050 Uiso 1 calc R . 
C61 C 0.7182(16) -0.6136(12) 0.9732(4) 0.035(3) Uani 1 d . . 
C62 C 0.8065(21) -0.6490(14) 0.9467(4) 0.047(4) Uani 1 d . . 
H62 H 0.8540(21) -0.6014(14) 0.9321(4) 0.050 Uiso 1 calc R . 
C63 C 0.8268(23) -0.7562(14) 0.9411(5) 0.052(4) Uani 1 d . . 
H63 H 0.8884(23) -0.7791(14) 0.9232(5) 0.050 Uiso 1 calc R . 
C64 C 0.7548(25) -0.8278(15) 0.9623(7) 0.068(6) Uani 1 d . . 
H64 H 0.7676(25) -0.8989(15) 0.9587(7) 0.050 Uiso 1 calc R . 
C65 C 0.6624(26) -0.7920(16) 0.9892(7) 0.070(6) Uani 1 d . . 
H65 H 0.6123(26) -0.8394(16) 1.0033(7) 0.050 Uiso 1 calc R . 
C66 C 0.6459(22) -0.6874(17) 0.9949(6) 0.059(5) Uani 1 d . . 
H66 H 0.5862(22) -0.6643(17) 1.0132(6) 0.050 Uiso 1 calc R . 
C71 C 0.5176(16) -0.4531(11) 0.9910(4) 0.033(3) Uani 1 d . . 
C72 C 0.4771(19) -0.4055(14) 1.0238(5) 0.041(4) Uani 1 d . . 
H72 H 0.5419(19) -0.3844(14) 1.0412(5) 0.050 Uiso 1 calc R . 
C73 C 0.3340(18) -0.3901(13) 1.0299(5) 0.044(4) Uani 1 d . . 
H73 H 0.3042(18) -0.3617(13) 1.0521(5) 0.050 Uiso 1 calc R . 
C74 C 0.2396(18) -0.4165(13) 1.0036(5) 0.045(4) Uani 1 d . . 
H74 H 0.1466(18) -0.4026(13) 1.0075(5) 0.050 Uiso 1 calc R . 
C75 C 0.2814(17) -0.4641(14) 0.9709(5) 0.045(4) Uani 1 d . . 
H75 H 0.2168(17) -0.4832(14) 0.9531(5) 0.050 Uiso 1 calc R . 
C76 C 0.4175(19) -0.4824(14) 0.9652(5) 0.043(4) Uani 1 d . . 
H76 H 0.4451(19) -0.5153(14) 0.9436(5) 0.050 Uiso 1 calc R . 
C81 C 0.7589(18) -0.4063(13) 0.9435(5) 0.041(3) Uani 1 d . . 
C82 C 0.8967(23) -0.3819(17) 0.9415(6) 0.055(5) Uani 1 d . . 
H82 H 0.9542(23) -0.4035(17) 0.9605(6) 0.050 Uiso 1 calc R . 
C83 C 0.9527(25) -0.3278(17) 0.9130(6) 0.064(5) Uani 1 d . . 
H83 H 1.0462(25) -0.3117(17) 0.9130(6) 0.050 Uiso 1 calc R . 
C84 C 0.8679(26) -0.2956(17) 0.8829(6) 0.067(5) Uani 1 d . . 
H84 H 0.9040(26) -0.2571(17) 0.8635(6) 0.050 Uiso 1 calc R . 
C85 C 0.7304(23) -0.3234(17) 0.8837(6) 0.060(5) Uani 1 d . . 
H85 H 0.6730(23) -0.3041(17) 0.8643(6) 0.050 Uiso 1 calc R . 
C86 C 0.6764(21) -0.3805(14) 0.9134(5) 0.052(4) Uani 1 d . . 
H86 H 0.5846(21) -0.4013(14) 0.9130(5) 0.050 Uiso 1 calc R . 
O1W O 0.7582(21) 0.2374(16) 0.7534(5) 0.085(5) Uani 1 d . . 
O2W O 1.4290(21) -0.2892(14) 0.8329(5) 0.086(5) Uani 1 d . . 
O3W O -0.0852(42) -0.2657(30) 0.7659(8) 0.197(16) Uani 1 d . . 
O4W O 0.4002(29) 0.1530(16) 0.7278(5) 0.151(8) Uani 1 d . . 
 
loop_ 
 _atom_site_aniso_label 
 _atom_site_aniso_U_11 
 _atom_site_aniso_U_22 
 _atom_site_aniso_U_33 
 _atom_site_aniso_U_23 
 _atom_site_aniso_U_13 
 _atom_site_aniso_U_12 
Re1 0.0404(4) 0.0355(3) 0.0334(3) 0.0007(3) 0.0001(3) -0.0036(3) 
O1 0.062(8) 0.040(6) 0.061(7) 0.004(6) -0.003(7) 0.000(6) 
Re2 0.0453(4) 0.0474(4) 0.0301(3) 0.0006(3) -0.0009(3) -0.0068(3) 
O2 0.046(7) 0.045(6) 0.061(7) 0.017(5) -0.004(6) -0.018(6) 
S1 0.048(2) 0.057(2) 0.037(2) 0.004(2) 0.007(2) -0.008(2) 
C11 0.038(8) 0.047(9) 0.062(10) 0.005(8) -0.003(8) -0.009(8) 
C12 0.041(7) 0.042(7) 0.033(7) -0.001(6) -0.006(6) -0.011(7) 
C13 0.046(9) 0.046(9) 0.053(10) -0.007(8) -0.008(8) 0.002(9) 
N11 0.042(7) 0.049(7) 0.031(6) 0.003(5) 0.001(6) -0.017(6) 
O11 0.124(12) 0.064(9) 0.036(7) -0.005(6) -0.005(8) 0.026(9) 
O12 0.067(9) 0.079(11) 0.101(11) -0.002(9) -0.039(9) -0.026(9) 
S2 0.057(3) 0.094(3) 0.047(2) 0.010(2) -0.013(2) -0.012(3) 
C21 0.039(10) 0.131(19) 0.076(14) 0.029(15) -0.026(10) -0.009(12) 
C22 0.051(12) 0.106(20) 0.095(18) 0.014(16) 0.016(13) 0.000(15) 
C23 0.066(14) 0.114(21) 0.089(17) 0.007(16) 0.007(13) 0.046(15) 
N21 0.047(8) 0.073(10) 0.046(7) 0.003(7) 0.009(6) -0.022(8) 
O21 0.063(8) 0.050(8) 0.070(8) -0.012(7) 0.007(7) 0.018(7) 
O22 0.099(16) 0.133(18) 0.165(19) 0.011(15) 0.011(15) 0.090(16) 
S3 0.058(2) 0.055(2) 0.038(2) 0.002(2) -0.002(2) 0.006(2) 
C31 0.060(11) 0.086(13) 0.045(10) -0.002(10) -0.005(9) 0.007(12) 
C32 0.065(12) 0.088(13) 0.030(8) -0.010(8) 0.005(8) -0.016(11) 
C33 0.058(11) 0.083(12) 0.034(8) -0.007(9) -0.003(8) 0.004(12) 
N31 0.045(7) 0.078(10) 0.035(7) 0.007(7) 0.004(6) -0.012(8) 
O31 0.053(7) 0.074(8) 0.043(6) -0.018(6) -0.006(6) -0.010(7) 
O32 0.094(11) 0.069(9) 0.057(9) -0.013(8) 0.000(9) 0.004(10) 
S4 0.049(2) 0.054(2) 0.045(2) 0.002(2) 0.011(2) -0.003(2) 
C41 0.046(9) 0.041(9) 0.070(11) -0.006(9) 0.000(8) -0.002(8) 
C42 0.049(10) 0.068(12) 0.053(10) 0.006(9) -0.020(8) -0.010(10) 
C43 0.078(18) 0.134(24) 0.064(14) 0.032(15) -0.005(14) 0.005(19) 
N41 0.049(8) 0.085(10) 0.035(7) 0.010(7) 0.001(6) -0.012(8) 
O41 0.068(10) 0.148(17) 0.075(11) 0.014(11) -0.005(9) 0.017(11) 
O42 0.066(15) 0.158(21) 0.228(25) 0.078(20) -0.062(17) -0.022(18) 
P1 0.036(2) 0.028(2) 0.036(2) 0.0028(14) -0.002(2) 0.001(2) 
C51 0.039(7) 0.035(7) 0.033(7) 0.007(6) -0.004(6) -0.005(7) 
C52 0.066(11) 0.037(9) 0.058(11) 0.006(8) -0.018(10) -0.019(9) 
C53 0.078(13) 0.053(11) 0.054(11) -0.005(9) -0.012(10) -0.006(10) 
C54 0.057(10) 0.059(11) 0.043(9) 0.008(8) -0.005(8) -0.017(9) 
C55 0.055(11) 0.068(11) 0.046(9) -0.003(9) -0.009(8) 0.009(10) 
C56 0.047(8) 0.040(8) 0.041(8) 0.008(7) -0.005(7) 0.012(7) 
C61 0.033(7) 0.031(7) 0.040(7) 0.003(6) 0.000(6) 0.001(6) 
C62 0.055(9) 0.046(9) 0.039(8) -0.003(7) 0.004(8) 0.004(9) 
C63 0.062(11) 0.040(8) 0.054(10) 0.000(8) 0.006(9) 0.002(9) 
C64 0.073(14) 0.032(9) 0.099(15) -0.012(10) 0.000(13) 0.008(10) 
C65 0.061(13) 0.034(9) 0.115(17) 0.009(10) 0.016(13) -0.002(10) 
C66 0.056(11) 0.047(10) 0.075(12) 0.010(10) 0.028(10) -0.003(9) 
C71 0.033(7) 0.026(6) 0.041(7) 0.001(6) -0.007(6) -0.002(6) 
C72 0.047(8) 0.040(8) 0.038(8) 0.003(7) -0.003(7) 0.001(8) 
C73 0.051(9) 0.038(8) 0.044(8) -0.003(7) 0.012(7) 0.001(7) 
C74 0.037(8) 0.037(8) 0.062(10) 0.004(8) 0.003(7) 0.002(8) 
C75 0.033(8) 0.057(10) 0.045(9) 0.000(8) -0.002(7) -0.016(7) 
C76 0.043(8) 0.045(8) 0.040(8) -0.007(7) -0.005(7) 0.002(8) 
C81 0.049(8) 0.031(7) 0.042(8) 0.006(6) 0.000(7) 0.006(7) 
C82 0.051(11) 0.062(12) 0.052(11) -0.007(9) 0.002(9) -0.010(10) 
C83 0.066(13) 0.059(12) 0.066(12) -0.001(10) 0.019(10) -0.021(11) 
C84 0.095(15) 0.049(10) 0.057(11) 0.006(9) 0.016(11) -0.006(11) 
C85 0.066(12) 0.064(12) 0.051(10) 0.022(9) 0.005(9) 0.023(10) 
C86 0.058(10) 0.055(9) 0.041(8) 0.016(7) -0.006(8) 0.024(9) 
O1W 0.094(12) 0.084(12) 0.078(11) 0.016(10) 0.011(10) -0.013(11) 
O2W 0.085(12) 0.072(10) 0.100(12) 0.015(9) 0.013(11) -0.017(10) 
O3W 0.246(39) 0.220(35) 0.125(19) -0.072(23) -0.030(26) 0.027(36) 
O4W 0.329(22) 0.082(12) 0.042(9) 0.023(9) 0.053(12) 0.089(16) 
 
_geom_special_details 
; 
 All esds (except the esd in the dihedral angle between two l.s. planes) 
 are estimated using the full covariance matrix.  The cell esds are taken 
 into account individually in the estimation of esds in distances, angles 
 and torsion angles; correlations between esds in cell parameters are only 
 used when they are defined by crystal symmetry.  An approximate (isotropic) 
 treatment of cell esds is used for estimating esds involving l.s. planes. 
; 
#=======================================================================
 
# Table VI. Selected bond lengths[\%A] and angles[\%]

loop_ 
 _geom_bond_atom_site_label_1 
 _geom_bond_atom_site_label_2 
 _geom_bond_distance 
 _geom_bond_site_symmetry_2 
 _geom_bond_publ_flag 
Re1 O1 1.607(12) . yes 
Re1 N11 2.179(13) . yes 
Re1 N21 2.180(20) . yes 
Re1 O21 2.208(14) . yes
Re1 S1 2.275(4) . yes 
Re1 S2 2.305(5) . yes 
Re2 O2 1.659(13) . yes
Re2 O31 2.150(13) . yes 
Re2 N41 2.180(20) . yes 
Re2 N31 2.190(14) . yes 
Re2 S4 2.273(5) . yes 
Re2 S3 2.307(5) . yes 
S1 C11 1.840(20) . yes 
C11 C12 1.540(20) . yes 
C12 N11 1.430(20) . yes 
C12 C13 1.510(20) . yes 
C13 O11 1.260(20) . yes 
C13 O12 1.290(20) . yes 
S2 C21 1.830(20) . yes 
C21 C22 1.450(40) . yes 
C22 C23 1.470(40) . yes 
C22 N21 1.480(30) . yes 
C23 O22 1.310(30) . yes 
C23 O21 1.300(30) . yes 
S3 C31 1.820(20) . yes
C31 C32 1.520(30) . yes 
C32 C33 1.490(30) . yes 
C32 N31 1.490(30) . yes 
C33 O31 1.310(30) . yes 
C33 O32 1.220(30) . yes 
S4 C41 1.800(20) . yes 
C41 C42 1.480(30) . yes 
C42 C43 1.520(30) . yes 
C42 N41 1.520(20) . yes
C43 O41 1.300(30) . yes 
C43 O42 1.250(40) . yes 
P1 C61 1.770(20) . ? 
P1 C71 1.790(20) . ? 
P1 C51 1.790(20) . ? 
P1 C81 1.790(20) . ? 
C51 C52 1.380(20) . ? 
C51 C56 1.380(20) . ? 
C52 C53 1.370(30) . ? 
C53 C54 1.360(30) . ? 
C54 C55 1.330(30) . ? 
C55 C56 1.400(30) . ? 
C61 C62 1.370(20) . ? 
C61 C66 1.420(20) . ? 
C62 C63 1.400(20) . ? 
C63 C64 1.390(30) . ? 
C64 C65 1.400(30) . ? 
C65 C66 1.370(30) . ? 
C71 C76 1.400(20) . ? 
C71 C72 1.390(20) . ? 
C72 C73 1.420(20) . ? 
C73 C74 1.360(30) . ? 
C74 C75 1.390(30) . ? 
C75 C76 1.360(20) . ? 
C81 C82 1.370(30) . ? 
C81 C86 1.390(20) . ? 
C82 C83 1.360(30) . ? 
C83 C84 1.430(30) . ? 
C84 C85 1.380(30) . ? 
C85 C86 1.400(30) . ? 
 
loop_ 
 _geom_angle_atom_site_label_1 
 _geom_angle_atom_site_label_2 
 _geom_angle_atom_site_label_3 
 _geom_angle 
 _geom_angle_site_symmetry_1 
 _geom_angle_site_symmetry_3 
 _geom_angle_publ_flag 
O1 Re1 N11 94.7(6) . . yes 
O1 Re1 N21 93.6(7) . . yes 
N11 Re1 N21 96.9(5) . . yes 
O1 Re1 O21 160.4(6) . . yes 
N11 Re1 O21 75.9(6) . . yes 
N21 Re1 O21 71.1(6) . . yes 
O1 Re1 S1 106.3(5) . . yes 
N11 Re1 S1 81.5(4) . . yes 
N21 Re1 S1 160.2(5) . . yes 
O21 Re1 S1 89.5(4) . . yes 
O1 Re1 S2 105.9(5) . . yes 
N11 Re1 S2 159.4(4) . . yes
N21 Re1 S2 82.7(4) . . yes 
O21 Re1 S2 84.7(4) . . yes
S1 Re1 S2 92.0(2) . . yes 
O2 Re2 O31 157.6(6) . . yes 
O2 Re2 N41 95.9(7) . . yes 
O31 Re2 N41 75.8(6) . . yes 
O2 Re2 N31 88.7(7) . . yes 
O31 Re2 N31 71.6(6) . . yes 
N41 Re2 N31 94.9(6) . . yes 
O2 Re2 S4 107.3(5) . . yes 
O31 Re2 S4 92.4(4) . . yes 
N41 Re2 S4 82.5(4) . . yes 
N31 Re2 S4 163.9(5) . . yes 
O2 Re2 S3 105.4(5) . . yes 
O31 Re2 S3 83.7(4) . . yes 
N41 Re2 S3 158.6(5) . . yes 
N31 Re2 S3 84.1(4) . . yes 
S4 Re2 S3 92.5(2) . . yes 
C11 S1 Re1 103.0(6) . . yes 
C12 C11 S1 108.4(11) . . yes 
N11 C12 C13 111.2(13) . . yes 
N11 C12 C11 107.3(13) . . yes 
C13 C12 C11 111.9(14) . . yes 
O11 C13 O12 122.2(18) . . yes 
O11 C13 C12 120.0(20) . . yes 
O12 C13 C12 118.0(20) . . yes 
C12 N11 Re1 116.2(9) . . yes 
C21 S2 Re1 98.7(7) . . yes 
C22 C21 S2 111.0(20) . . yes
C23 C22 C21 110.0(20) . . yes 
C23 C22 N21 105.0(20) . . yes 
C21 C22 N21 107.0(20) . . yes 
O22 C23 O21 118.0(30) . . yes 
O22 C23 C22 123.0(30) . . yes 
O21 C23 C22 120.0(30) . . yes 
C22 N21 Re1 104.4(13) . . yes 
C23 O21 Re1 110.0(20) . . yes 
C31 S3 Re2 100.2(7) . . yes 
C32 C31 S3 110.0(20) . . yes 
C33 C32 N31 105.0(20) . . yes 
C33 C32 C31 110.0(20) . . yes 
N31 C32 C31 110.0(20) . . yes 
O31 C33 O32 123.0(20) . . yes 
O31 C33 C32 114.0(20) . . yes 
O32 C33 C32 123.0(20) . . yes 
C32 N31 Re2 102.9(11) . . yes 
C33 O31 Re2 115.8(12) . . yes 
C41 S4 Re2 101.9(6) . . yes 
C42 C41 S4 110.8(13) . . yes 
C43 C42 N41 109.0(20) . . yes 
C43 C42 C41 115.0(20) . . yes 
N41 C42 C41 106.0(20) . . yes 
O41 C43 O42 125.0(30) . . yes
O41 C43 C42 121.0(30) . . yes 
O42 C43 C42 115.0(30) . . yes 
C42 N41 Re2 112.9(11) . . yes 
C61 P1 C71 109.8(7) . . ? 
C61 P1 C51 109.2(8) . . ? 
C71 P1 C51 110.7(7) . . ? 
C61 P1 C81 109.0(8) . . ?
C7 P1 C81 112.0(8) . . ? 
C51 P1 C81 106.1(8) . . ? 
C52 C51 C56 120.0(20) . . ? 
C52 C51 P1 119.4(14) . . ? 
C56 C51 P1 120.8(13) . . ? 
C53 C52 C51 120.0(20) . . ? 
C52 C53 C54 119.0(20) . . ? 
C55 C54 C53 123.0(20) . . ? 
C54 C55 C56 120.0(20) . . ? 
C51 C56 C55 119.0(20) . . ? 
C62 C61 C66 119.0(20) . . ? 
C62 C61 P1 122.1(13) . . ? 
C66 C61 P1 119.3(14) . . ? 
C61 C62 C63 121.0(20) . . ? 
C64 C63 C62 120.0(20) . . ? 
C63 C64 C65 119.0(20) . . ? 
C66 C65 C64 120.0(20) . . ? 
C65 C66 C61 121.0(20) . . ? 
C76 C71 C72 120.0(20) . . ? 
C76 C71 P1 119.8(12) . . ? 
C72 C71 P1 120.7(12) . . ? 
C71 C72 C73 118.0(20) . . ? 
C74 C73 C72 121.0(20) . . ? 
C73 C74 C75 121.0(20) . . ? 
C76 C75 C74 119.0(20) . . ? 
C75 C76 C71 122.0(20) . . ? 
C82 C81 C86 118.0(20) . . ? 
C82 C81 P1 120.0(20) . . ? 
C86 C81 P1 122.5(14) . . ? 
C83 C82 C81 123.0(20) . . ? 
C82 C83 C84 120.0(20) . . ? 
C85 C84 C83 118.0(20) . . ? 
C86 C85 C84 121.0(20) . . ? 
C85 C86 C81 121.0(20) . . ? 


#======================================================

# Table S-II. Water contacts (upto 3.25\%A)


loop_
 _geom_contact_atom_site_label_1
 _geom_contact_atom_site_label_2
 _geom_contact_distance
 _geom_contact_site_symmetry_1
 _geom_contact_site_symmetry_2
 _geom_contact_publ_flag
O11 O4W 2.79(3) . . no
N11 O1W 3.04(2) . . no
O22 O2W 2.73(3) . . no
O41 O3W 2.68(4) . . no
O2 O2W 2.92(2) . 1_455 no
O12 O1W 3.10(3) . 3_646 no
O12 O4W 2.84(3) . 3_646 no
O21 O3W 3.06(4) . 1_655 no
O22 O1W 3.00(3) . 3_746 no
O32 O4W 2.58(2) . 1_545 no
O42 O1W 3.02(4) . 1_445 no
O1W O3W 3.25(5) . 3_656 no
O2W O4W 2.85(3) . 3_746 no
O3W O4W 3.24(5) . 3_546 no
 
_refine_diff_density_max    5.146 
_refine_diff_density_min   -3.202 
_refine_diff_density_rms    0.230 
